# Supplementary material for: Identification of Biotransformation Products of T-2 Toxin in HepG2 Cells Using LC-Q-TOF MS
Source: MDPI journal article supplement (doi:10.3390/foods13101501), 2024-05-13
Supplement: s1 [file s1]

# SUPPLEMENTARY MATERIAL

## Identification of Biotransformation Products of T-2 Toxin in HepG2 Cells Using LC-Q-TOF MS

Mercedes Taroncher <sup>1,2</sup>, Veronica Zingales <sup>1,2</sup>, Yelko Rodríguez-Carrasco <sup>1,2,\*</sup>  
and María José Ruiz <sup>1,2</sup>

<sup>1</sup> Laboratory of Food Chemistry and Toxicology, Faculty of Pharmacy and Food Science, University of Valencia, Av. Vicent Andrés Estellés s/n, 46100 Burjassot, Spain; mercedes.taroncher@uv.es (M.T.); veronica.zingales@uv.es (V.Z.); m.jose.ruiz@uv.es (M.J.R.)

<sup>2</sup> Research Group Alternative Methods for Determining Toxic Effects and Risk Assessment of Contaminants and Mixtures (RiskTox; GIUV2021-513), University of Valencia, 46100 València, Spain

\* Correspondence: yelko.rodriguez@uv.es; Tel./Fax: +34-96-3544-228

| CELL FRACTION    |           |           |                |                  |          |
|------------------|-----------|-----------|----------------|------------------|----------|
| Time of exposure | Mycotoxin |           |                |                  |          |
|                  | T-2 (nM)  | HT-2 (nM) | T-2 triol (nM) | T-2 tetraol (nM) | NEO (nM) |
| 0h               | <LOQ      | <LOQ      | <LOQ           | <LOQ             | <LOQ     |
|                  | <LOQ      | <LOQ      | <LOQ           | <LOQ             | <LOQ     |
|                  | <LOQ      | <LOQ      | <LOQ           | <LOQ             | <LOQ     |
| 1h               | <LOQ      | 27,43     | 0,72           | <LOQ             | <LOQ     |
|                  | <LOQ      | 25,6      | 0,94           | <LOQ             | <LOQ     |
|                  | <LOQ      | 24,8      | 0,8            | <LOQ             | <LOQ     |
| 2h               | <LOQ      | 32        | 1,65           | <LOQ             | <LOQ     |
|                  | <LOQ      | 31,87     | 1,64           | <LOQ             | <LOQ     |
|                  | <LOQ      | 33,51     | 1,7            | <LOQ             | <LOQ     |
| 3h               | <LOQ      | 33,56     | 1,11           | 1,19             | <LOQ     |
|                  | <LOQ      | 34,84     | 1,17           | 1,24             | <LOQ     |
|                  | <LOQ      | 39,54     | 1,16           | 1,18             | <LOQ     |
| 6h               | <LOQ      | 44,41     | 0,39           | 1,74             | <LOQ     |
|                  | <LOQ      | 43,61     | 0,34           | 1,81             | <LOQ     |
|                  | <LOQ      | 45,17     | 0,42           | 1,73             | <LOQ     |
| 8h               | <LOQ      | 40,61     | 0,51           | 1,71             | <LOQ     |
|                  | <LOQ      | 41,53     | 0,52           | 1,73             | <LOQ     |
|                  | <LOQ      | 40,58     | 0,55           | 1,74             | <LOQ     |
| 24h              | <LOQ      | 39,47     | 0,61           | 1,84             | 1,46     |
|                  | <LOQ      | 38,84     | 0,63           | 1,86             | 1,52     |
|                  | <LOQ      | 41,61     | 0,68           | 1,85             | 1,63     |

**Table S1.** Concentration of T-2, HT-2, T2-triol, T2-tetraol and Neo identified and quantified by LC-Q-TOF MS in the cell fraction of HepG2 cells after 0, 1, 2, 3, 6, 8 and 24 h of 60 nM of T-2 exposure to 60 nM T-2.

| CULTURE MEDIUM   |           |           |                |                  |          |
|------------------|-----------|-----------|----------------|------------------|----------|
| Time of exposure | Mycotoxin |           |                |                  |          |
|                  | T-2 (nM)  | HT-2 (nM) | T-2 triol (nM) | T-2 tetraol (nM) | NEO (nM) |
| 0h               | 57,8      | <LOQ      | <LOQ           | <LOQ             | <LOQ     |
|                  | 59,4      | <LOQ      | <LOQ           | <LOQ             | <LOQ     |
|                  | 58,9      | <LOQ      | <LOQ           | <LOQ             | <LOQ     |
| 1h               | 18,4      | 11,3      | <LOQ           | <LOQ             | <LOQ     |
|                  | 17,6      | 11,1      | <LOQ           | <LOQ             | <LOQ     |
|                  | 18,9      | 11,5      | <LOQ           | <LOQ             | <LOQ     |
| 2h               | 5,4       | 15,4      | 0,41           | <LOQ             | <LOQ     |
|                  | 5,3       | 15,7      | 0,46           | <LOQ             | <LOQ     |
|                  | 5,8       | 15,6      | 0,51           | <LOQ             | <LOQ     |
| 3h               | 1,7       | 18,1      | 0,19           | <LOQ             | <LOQ     |
|                  | 1,8       | 17,9      | 0,24           | <LOQ             | <LOQ     |
|                  | 2,1       | 18,5      | 0,23           | <LOQ             | <LOQ     |
| 6h               | <LOQ      | 12,4      | 0,15           | 0,02             | <LOQ     |
|                  | <LOQ      | 12,6      | 0,12           | 0,05             | <LOQ     |
|                  | <LOQ      | 12,7      | 0,09           | 0,03             | <LOQ     |
| 8h               | <LOQ      | 12,7      | 0,11           | 0,21             | <LOQ     |
|                  | <LOQ      | 12,6      | 0,14           | 0,19             | <LOQ     |
|                  | <LOQ      | 12,4      | 0,08           | 0,23             | <LOQ     |
| 24h              | <LOQ      | 12,6      | 0,03           | 0,94             | 0,21     |
|                  | <LOQ      | 12,1      | 0,02           | 1,23             | 0,22     |
|                  | <LOQ      | 12,9      | 0,05           | 0,98             | 0,17     |

**Table S2.** Concentration of T-2, HT-2, T2-triol, T2-tetraol and Neo identified and quantified by LC-Q-TOF MS in the culture medium of HepG2 cells after 0, 1, 2, 3, 6, 8 and 24 h of 60 nM of T-2 exposure.
